# Supplementary material for: PolySMart: a general coarse-grained molecular dynamics polymerization scheme
Source: Royal Society of Chemistry journal article supplement (doi:10.1039/d3mh00088e), 2023-01-01
Supplement: d3mh00088e1.pdf [file d3mh00088e1.pdf]

**Supporting Information for:**  
**PolySMart: a general coarse-grained molecular dynamics  
polymerization scheme**

Seyyed Mohammad Mousavifard<sup>1</sup>, Hassan Ghermezcheshme<sup>1</sup>, Alireza Mirzaalipour<sup>1</sup>,  
Mohsen Mohseni<sup>1</sup>, Gijsbertus de With<sup>2</sup>, Hesam Makki<sup>3\*</sup>

<sup>1</sup> *Department of Polymer and Color Engineering, Amirkabir University of Technology, 424 Hafez Ave., Tehran, Iran.*

<sup>2</sup> *Laboratory of Physical Chemistry, Department of Chemical Engineering & Chemistry, Eindhoven University of Technology, POB 513, NL-5600 MB Eindhoven, The Netherlands.*

<sup>3</sup> *Department of Chemistry and Materials Innovation Factory, University of Liverpool, Liverpool L69 7ZD, U. K.*

Corresponding Author:

Hesam Makki

Email: [hmakki@liverpool.ac.uk](mailto:hmakki@liverpool.ac.uk)

## **S1-Homo-polymerization of lactic acid**

The connectivity graphs for different conversion values of test case 1 (Homo-polymerization of lactic acid) are shown in Figure S1. These figures are generated with a code written in Matlab software utilizing the Matlab graph and network algorithm library. The program analyzes the connectivity of beads, identifies each chain, separates them for better visualization, and sorts them based on the number of their beads. This tool operates like size-exclusion chromatography and aids to have better visualization and quantitative measures of individual polymer chain molecular weights and the amount of residual short oligomers at different stages of the reaction. Given this information, we can analyze each individual chain in terms of length and shape and are able to calculate the molecular weight of each chain and so the dispersity index.

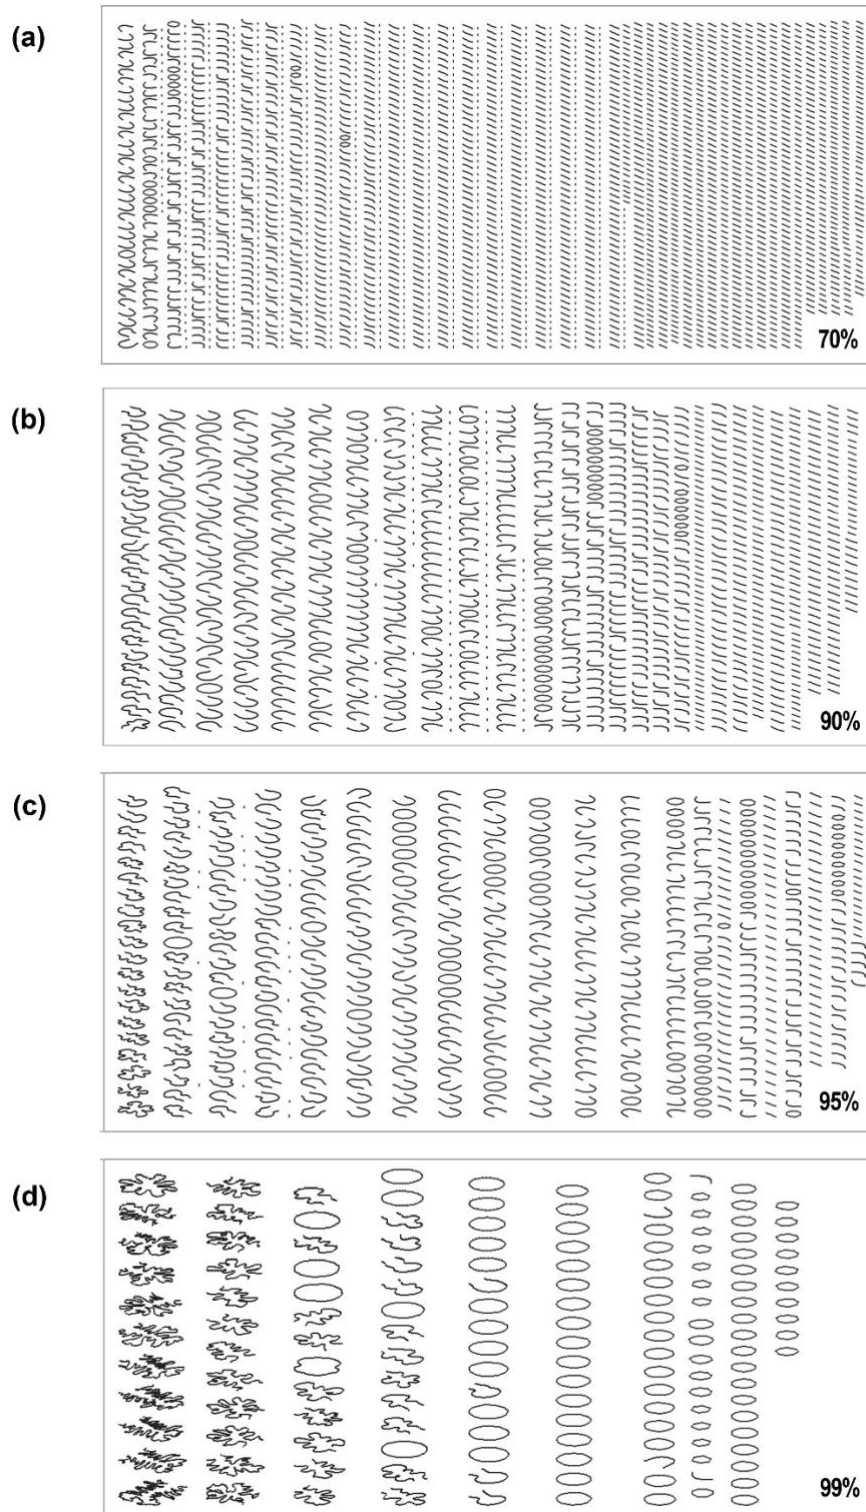

Figure S1. Structure of the formed PLA oligomers and chains at different conversion values. Topologies are made as simple graphs in which only the connectivity information of beads is considered and the correct positions of the beads in the simulation box are not preserved for better visualization.

## S2- Bonded interaction parameters calculation

According to the recommended procedure for Martini3 CG forcefield, the following steps were done to determine the equilibrium values and force constants for bond and angle

potentials for all the molecules. First, a minimum of 5 ns *NPT* simulation was performed on a box containing at least 10 molecules, at the atomistic level by means of the OPLS-AA force field with a time step of 1 fs. Temperature and pressure were controlled using *v*-rescale thermostat and Parrinello-Rahman barostat. Thereafter the distributions of the bonds and angles connecting the center of the geometry (COG) of the atoms of a bead were averaged over time. The distributions were converted into potential values via equation S1. By fitting equations, S2 and S3, force constants for bonds, angles, and equilibrium values were obtained. A list of equilibrium values and force constants for all bonded interactions at the CG level is provided in Table S1-S9. For dendrimer, the dihedral potentials were also included, and the values were just manually set in a way that the dihedral potential distribution of the CG structure fits the atomistic distribution. For other cases, the dihedral potentials at the CG level were ignored for simplicity.

$$U = -\ln(p) kT \quad (S1)$$

$$U_{\text{bond}} = \frac{1}{2} K_{\text{bond}} (l - l_0)^2 \quad (S2)$$

$$U_{\text{angle}} = \frac{1}{2} K_{\text{angle}} [\cos(\theta) - \cos(\theta_0)]^2 \quad (S3)$$

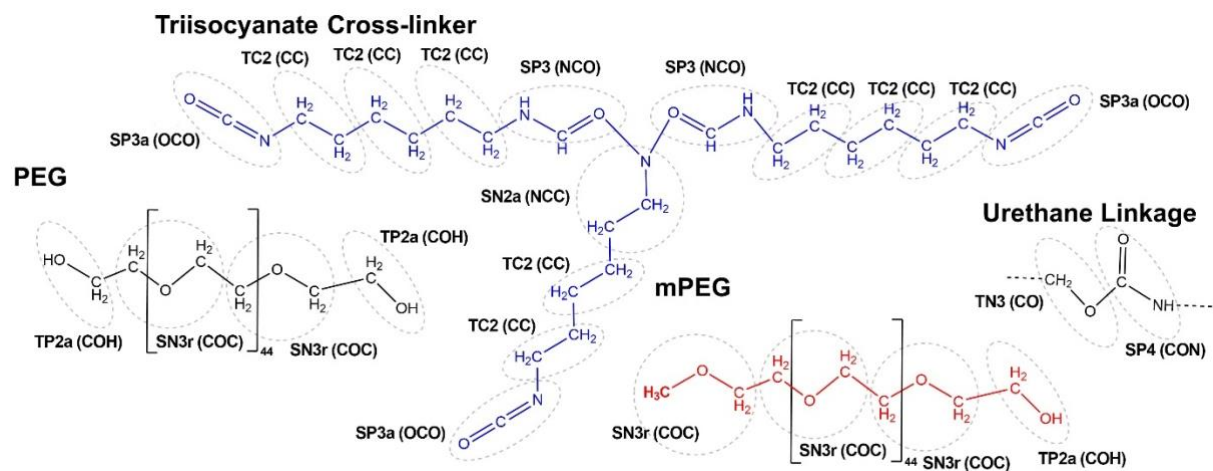

Figure S2. Martini CG model and bead types for crosslinked polyurethane network compositions.

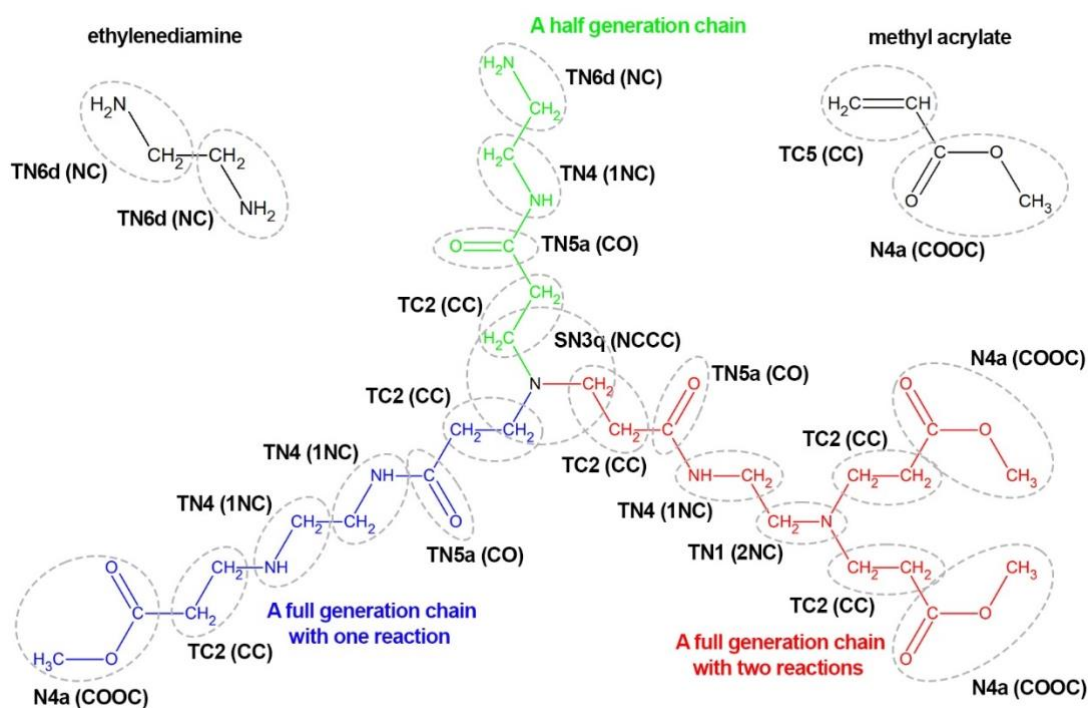

Figure S3. Martini CG model and bead types for monomers and dendrimer possible structures

Table S1. Bond type parameters for “homo-polymerization of lactic acid” case.

| Bond             | $l_0$ (nm) | $K_{\text{bond}}$ (kJ mol <sup>-1</sup> nm <sup>-2</sup> ) |
|------------------|------------|------------------------------------------------------------|
| lactic acid      |            |                                                            |
| CCOH-COOH        | 0.268      | 30000                                                      |
| poly lactic acid |            |                                                            |
| CC-COO           | 0.282      | 33050                                                      |
| CCOH-COO         | 0.243      | 53300                                                      |
| CC-COOH          | 0.263      | 18000                                                      |

Table S2. Bond type parameters for the “crosslinked polyurethane network” case.

| Bond                      | $l_0$ (nm) | $K_{\text{bond}}$ (kJ mol <sup>-1</sup> nm <sup>-2</sup> ) |
|---------------------------|------------|------------------------------------------------------------|
| PEG and mPEG              |            |                                                            |
| COH-COC                   | 0.2692     | 11000                                                      |
| COC-COC                   | 0.3119     | 7800                                                       |
| Triisocyanate Crosslinker |            |                                                            |
| OCO-CC                    | 0.295      | 15500                                                      |
| CC-CC                     | 0.248      | 32000                                                      |
| CC-NCO                    | 0.278      | 16400                                                      |
| NCO-NCC                   | 0.318      | 13600                                                      |
| NCC-CC                    | 0.282      | 12500                                                      |
| Urethane Linkage          |            |                                                            |
| CO-CON                    | 0.290      | 30000                                                      |

Table S3. Bond type parameters for the “PAMAM dendrimer” case.

| Bond            | $l_0$ (nm) | $K_{\text{bond}}$ (kJ mol <sup>-1</sup> nm <sup>-2</sup> ) |
|-----------------|------------|------------------------------------------------------------|
| methyl acrylate |            |                                                            |
| CC-COOC         | 0.381      | 44000                                                      |
| ethylenediamine |            |                                                            |
| NC-NC           | 0.224      | 30000                                                      |
| dendrimer       |            |                                                            |
| CC-NCCC         | 0.202      | 19600                                                      |
| CC-CO           | 0.217      | 46000                                                      |
| CO-1NC          | 0.262      | 53000                                                      |
| 1NC-NC          | 0.248      | 13200                                                      |
| CC-1NC          | 0.258      | 14600                                                      |
| 1NC-1NC         | 0.234      | 22900                                                      |
| 1NC-2NC         | 0.227      | 40700                                                      |
| 2NC-CC          | 0.268      | 11400                                                      |
| CC-COOC         | 0.348      | 24500                                                      |

Table S4. Bond type parameters for “hyperbranched polymer” case.

| Bond                       | $l_0$ (nm) | $K_{\text{bond}}$ (kJ mol <sup>-1</sup> nm <sup>-2</sup> ) |
|----------------------------|------------|------------------------------------------------------------|
| 3, 5-dihydroxybenzoic acid |            |                                                            |
| CCR-COH                    | 0.197      | 81531                                                      |
| CCR-COOH                   | 0.287      | 176440                                                     |
| 1, 6-dibromohexane         |            |                                                            |
| CCA-CCB                    | 0.284      | 38117                                                      |
| DMF                        |            |                                                            |
| CO-NCC                     | 0.250      | 51746                                                      |
| Constraint                 |            |                                                            |
| $l_0$ (nm)                 |            |                                                            |
| 3, 5-dihydroxybenzoic acid |            |                                                            |
| CCR-CCR                    | 0.27       |                                                            |

Table S5. Angle type parameters for “homo-polymerization of lactic acid” case.

| Angle           | $\vartheta_0$ (°) | $K_{\text{angle}}$ (kJ mol <sup>-1</sup> rad <sup>-2</sup> ) |
|-----------------|-------------------|--------------------------------------------------------------|
| polylactic acid |                   |                                                              |
| CC-COO-CC       | 128.0             | 102                                                          |
| COO-CC-COO      | 68.0              | 217                                                          |
| CCOH-COO-CC     | 127.0             | 200                                                          |
| COOH-CC-COO     | 69.0              | 100                                                          |

Table S6. Angle type parameters for the “crosslinked polyurethane network” case.

| Angle                     | $\vartheta_0$ (°) | $K_{\text{angle}}$ (kJ mol <sup>-1</sup> rad <sup>-2</sup> ) |
|---------------------------|-------------------|--------------------------------------------------------------|
| PEG                       |                   |                                                              |
| COH-COC-COC               | 121.43            | 35.5                                                         |
| COC-COC-COC               | 114.2             | 38.1                                                         |
| Triisocyanate Crosslinker |                   |                                                              |
| OCO-CC-CC                 | 119.73            | 241.6                                                        |
| CC-CC-CC                  | 147.5             | 474.8                                                        |
| CC-NCO-NCC                | 120.73            | 550.6                                                        |
| NCO-NCC-OCN               | 74                | 122                                                          |
| NCO-NCC-CC                | 136.12            | 197.8                                                        |
| CC-CC-NCC                 | 163.9             | 153                                                          |

Table S7. Angle type parameters for the “PAMAM dendrimer” case.

| Angle       | $\vartheta_0$ (°) | $K_{\text{angle}}$ (kJ mol <sup>-1</sup> rad <sup>-2</sup> ) |
|-------------|-------------------|--------------------------------------------------------------|
| dendrimer   |                   |                                                              |
| NCCC-CC-CO  | 149.0             | 370                                                          |
| CC-CO-1NC   | 96.0              | 480                                                          |
| CO-1NC-NC   | 128.0             | 160                                                          |
| CO-1NC-1NC  | 126.0             | 200                                                          |
| 1NC-1NC-CC  | 138.0             | 30                                                           |
| 1NC-CC-COOC | 157.0             | 150                                                          |
| CO-1NC-2NC  | 120.0             | 180                                                          |
| 1NC-2NC-CC  | 119.0             | 50                                                           |
| 2NC-CC-COOC | 152.0             | 87                                                           |
| CC-2NC-CC   | 78.0              | 100                                                          |

Table S8. Angle type parameters for “hyperbranched polymer” case.

| Angle                      | $\vartheta_0$ (°) | $K_{\text{angle}}$ (kJ mol <sup>-1</sup> rad <sup>-2</sup> ) |
|----------------------------|-------------------|--------------------------------------------------------------|
| 3, 5-dihydroxybenzoic acid |                   |                                                              |
| CCR-CCR-COH                | 142.8             | 3071                                                         |
| CCR-CCR-COOH               | 75.2              | 3410                                                         |
| COH-CCR-CCR                | 83.5              | 2476                                                         |
| COH-CCR-CCR                | 142.8             | 5396                                                         |
| CCR-CCR-COOH               | 134.8             | 4022                                                         |
| COH-CCR-CCR                | 83.8              | 1853                                                         |
| 1, 6-dibromohexane         |                   |                                                              |
| CCB-CCA-CCB                | 158.3             | 150.5                                                        |

Table S9. Dihedral type parameters for the "PAMAM dendrimer" case.

| Dihedral        | $\vartheta_0$ (°) | $K_{\text{dihedral}}$ (kJ mol <sup>-1</sup> ) | multiplicity |
|-----------------|-------------------|-----------------------------------------------|--------------|
| dendrimer       |                   |                                               |              |
| NCCC-CC-CO-1NC  | 0                 | 10                                            | 1            |
| CC-CO-1NC-NC    | 0                 | 8                                             | 2            |
| CO-1NC-1NC-CC   | 0                 | 8                                             | 1            |
| CO-1NC-2NC-CC   | 0                 | 7                                             | 1            |
| 1NC-2NC-CC-COOC | 0                 | 3                                             | 2            |
| CC-2NC-CC-COOC  | 0                 | 5                                             | 1            |
| CC-CO-1NC-1NC   | 0                 | 7                                             | 2            |
| CC-CO-1NC-2NC   | 0                 | 8                                             | 2            |

### S3- Details of MD simulations

The simulation box for various cases was built and the relaxation steps were done with the following settings on GROMACS 2020.

#### Homo-polymerization of lactic acid (test case 1)

25,000 monomers of PLA were randomly placed in a simulation box. An energy minimization step using a steep integrator was performed on the simulation box, followed by a 50 ns equilibration under *NPT* conditions at 298 K and 1 bar pressure with a 20 fs time-step. The v-rescale thermostat and Parrinello-Rahman barostat were used for controlling the temperature and pressure during the equilibration. Thereafter the reactions were switched on and the polymerization was done.

#### Crosslinked polyurethane network (test case 2)

For crosslinking the monomers, 999 molecules of polyethylene glycol (PEG) and 666 molecules of triisocyanate crosslinker were randomly inserted into the simulation box. For dangling chain containing cases, 10 % of PEG hydroxyl groups were replaced by polyethylene glycol monomethyl ether (mPEG). Following energy minimization by the steep integrator, the system was equilibrated under constant *NPT* conditions at 300 K and 1 bar pressure with a 20 fs time-step during 10 ns. The Berendsen thermostat in the velocity rescaling scheme and Berendsen barostat were used for the *NPT* conditions. Thereafter the reaction between the hydroxyl and isocyanate bead was done.

#### PAMAM dendrimer (test case 3)

The construction of the dendrimer was performed step-by-step. First, 10 molecules of 0.5<sup>th</sup> generation were placed in a simulation box containing 12000 ethylenediamine (EDA) molecules solvated in methanol. Thereafter an energy minimization by using a steep integrator and 50 ns of relaxation under *NPT* conditions at 300 K and 1 bar pressure with a 10 fs time-step was performed using the v-rescale thermostat and Parrinello-Rahman barostat. After these steps, the reactions were switched on and the 1<sup>st</sup> generation of dendritic molecules was constructed. After removing unreacted species from the simulation box, 12000 methyl acrylate (MA) molecules were added to the box to perform the next step of the



reaction. The same relaxation as for the previous step was done followed by the reaction steps which produces the 1.5<sup>th</sup> generation structures. These steps were iterated to produce 7<sup>th</sup> generation structures of PAMAM dendrimers.

#### Hyperbranched polymer (test case 4)

First of all, 2500 molecules of 1,6-dibromohexane, 2500 molecules of 3,5-dihydroxybenzoic acid and 5000 molecules of dimethylformamide (DMF) were inserted into the simulation box. Following energy minimization by using a steep integrator, the system was equilibrated under *NPT* conditions at 298 K and 1 bar pressure with a 5 fs time-step during 5 ns. The *v*-rescale thermostat and Berendsen barostat were used for the *NPT* conditions.

#### S4- Crosslinked polyurethane networks

Figure S4 shows the connectivity graphs of test case 2 (Crosslinked polyurethane networks).

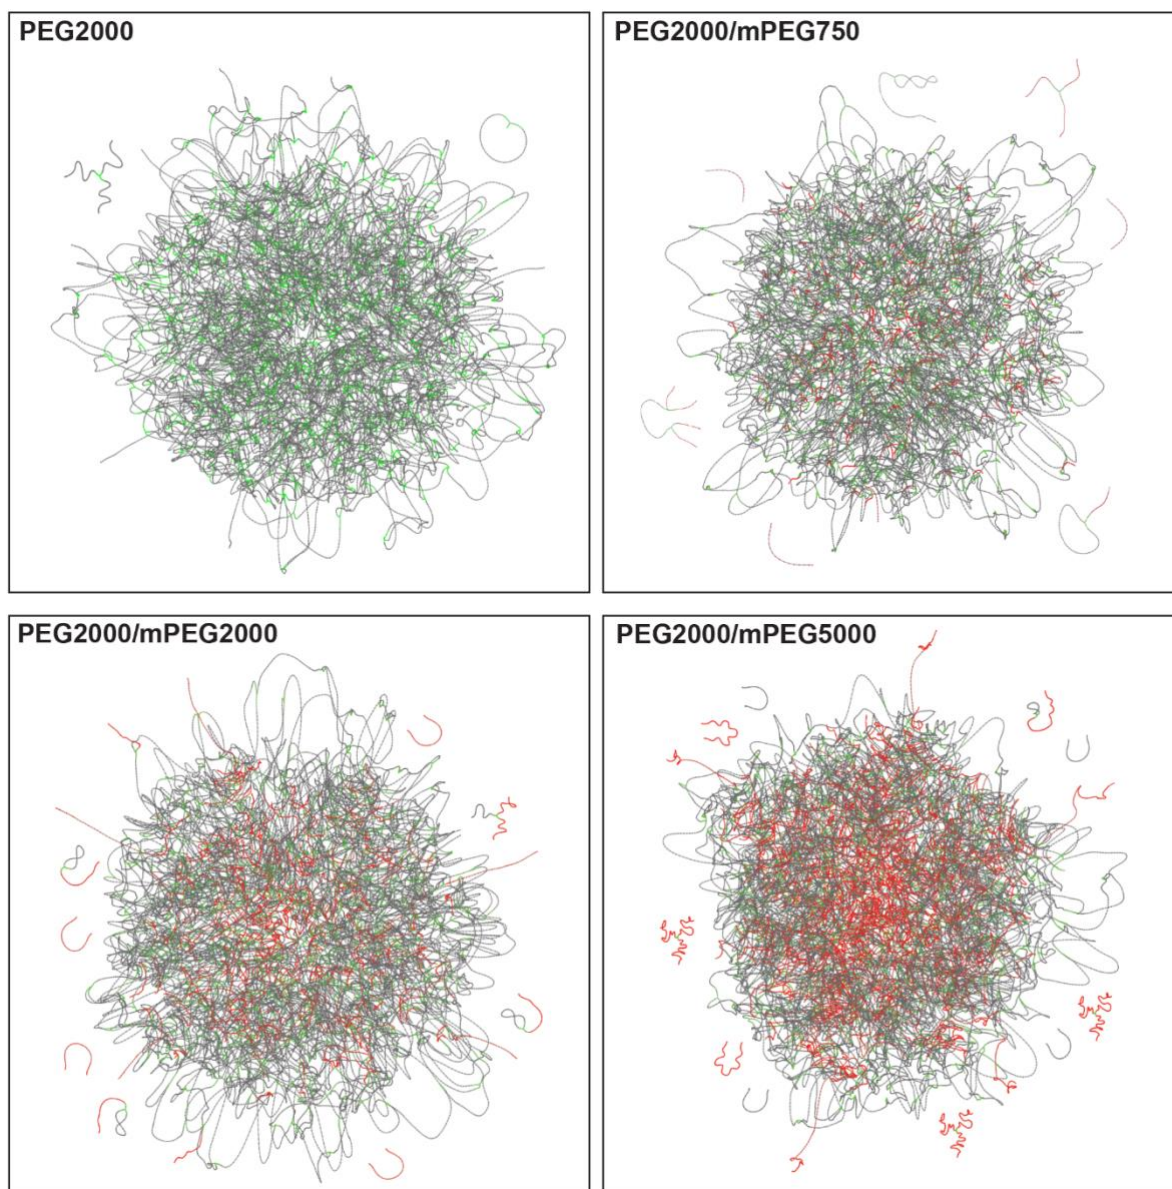

Figure S4. Molecular structure of Final Networks for cross-linked polyurethane case.

## S5- Hyperbranched polymers

Determining the reactivity of the hydroxyl groups through the analysis of reaction products of 1, 6-dibromohexane and 3,5-dihydroxybenzoic acid by  $^1\text{H}$ NMR and GPC analysis is difficult. For this reason, the reference paper designed a model reaction of monofunctional 1-bromohexane with 3,5-dihydroxybenzoic acid under the same reaction conditions. The products of this reaction were determined by  $^1\text{H}$  NMR spectrum (See Figure S5). We mimicked this reaction in simulation too. The reaction probabilities of CCB with  $\text{COOH}$ ,  $\text{COH}_A$ , and  $\text{COH}_B$  beads were set to 1, 0.2, and 0.3, respectively. Table S10 lists the product ratios obtained by  $^1\text{H}$  NMR analysis and MD simulation.

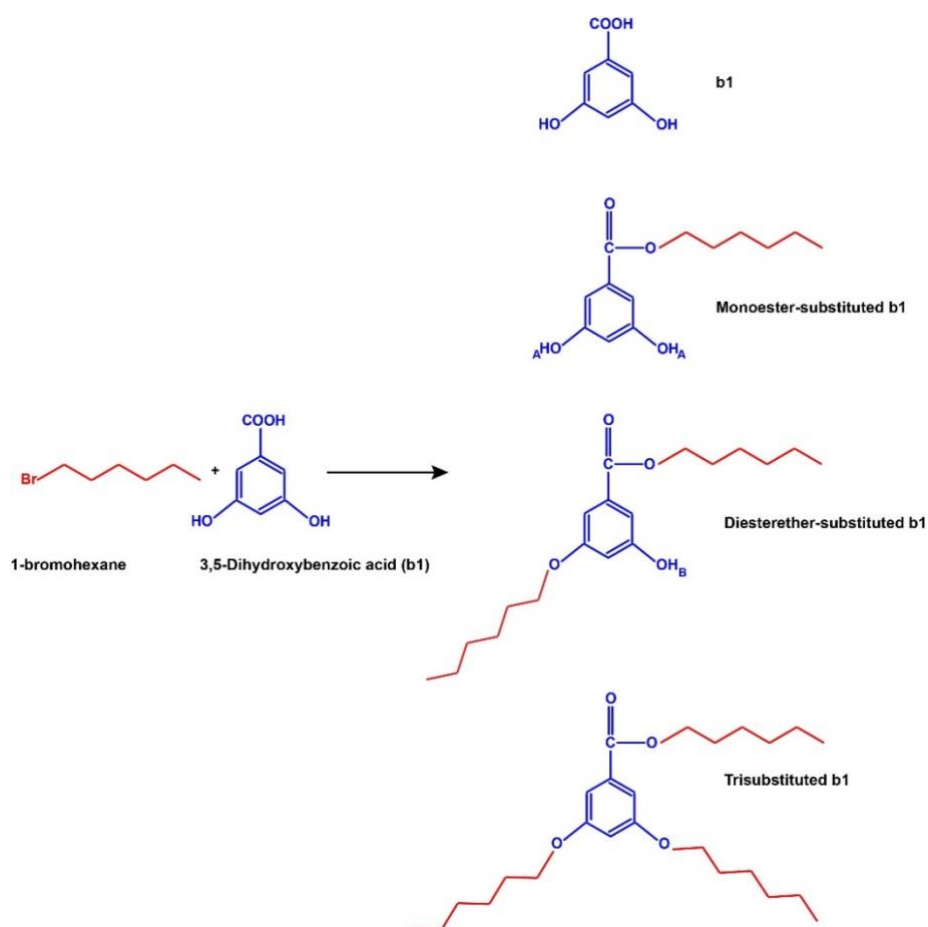

Figure S5. The reaction scheme of 1-bromohexane and 3,5-dihydroxybenzoic acid.

Table S10. The percentage of unreacted, monoester-substituted, diesterether-substituted and trisubstituted b1 in products from 1-bromohexane and 3,5-dihydroxybenzoic acid (1:1 molar ratio).

|                                            | b1     | Monoester-substituted b1 | Diesterether-substituted b1 | Trisubstituted b1 |
|--------------------------------------------|--------|--------------------------|-----------------------------|-------------------|
| Percentage of products ( $^1\text{H}$ NMR) | 23.0 % | 57.8 %                   | 16.0 %                      | 3.2 %             |
| Percentage of products (simulation)        | 23.8 % | 56.6 %                   | 15.4 %                      | 4.2 %             |
